# Supplementary material for: Acquisition of innate odor preference depends on spontaneous and experiential activities during critical period
Source: eLife. 2021 Mar 26;10:e60546. doi: 10.7554/eLife.60546 (PMC8032394; doi:10.7554/eLife.60546)
Supplement: Figure 1—source data 1. [file elife-60546-fig1-data1.xlsx]

## Sheet: Sheet1
Figure 1Biii ISI distribution																																			Figure 1Biv Spikerate			Figure 1Cii EOG				Figure1F Preference Index
																																			WT	HET		B6	Ctrl	KIR2.1		AA/HPH			HXH/HXO			PTO/VAH
bin center	WT	WT	WT	WT	WT	WT	WT	WT	WT	WT	WT	WT	WT	WT	WT				HET	HET	HET	HET	HET	HET	HET	HET	HET	HET	HET	HET	HET	HET		7.73489	8.43093		3.392	4.906	3.83		CTRL	KIR		CTRL	KIR		CTRL	KIR
																																		5.63332	5.65097		6.664	7.682	5.565		58.289	-145.49		-6.72272	52.8513		27.5743	29.6388
1.025	0	0.00118906	0	0	0.003125	0	0	0	0.00609756	0	0	0	0	0	0				0	0	0	0	0	0	0	0	0	0	0	0	0	0		10.2404	4.50858		5.207	4.964	6.549		117.084	124.611		2.24638	58.9746		35.6453	113.607
1.075	0	0	0	0	0.0078125	0	0	0	0	0	0	0	0.00304878	0	0				0	0	0	0	0	0	0	0	0	0	0	0	0	0		5.01822	6.12787		8.16	6.141	9.179		0	146.532		118.582	-3.91653		8.15912	11.7192
1.125	0	0	0.00446429	0	0.003125	0	0	0	0.00609756	0.00487805	0	0	0	0	0.016129				0	0	0	0.00943396	0	0	0	0	0	0	0	0	0	0		2.80422	8.79073		5.782	9.878	9.049		13.2199	-7.98347		30.5435	14.6392		7.14664	83.9465
1.175	0	0	0.0357143	0	0	0	0	0	0.0121951	0	0	0	0	0	0				0	0	0	0	0	0	0	0	0	0	0	0	0	0		4.20685	8.75662		6.991	6.943	6.828		69.0023	39.5599		64.4118	130.881		108.959	46.9804
1.225	0	0	0.0669643	0	0.009375	0.00138313	0	0	0.00609756	0	0	0	0	0	0.016129				0	0	0.00239234	0.00943396	0	0	0	0.00414938	0	0	0.00396825	0	0	0		8.35113	4.04348		5.988	7.349	2.761		53.8427	-22.1261		76.7844	227.847		89.7454	29.9007
1.275	0	0.00356718	0.0982143	0	0.0078125	0.0055325	0	0	0.00609756	0	0	0	0	0	0.0483871				0	0	0.00239234	0.00943396	0	0	0	0	0	0	0	0	0	0		7.53252	6.53333		5.368	8.253	7.309		13.8119	53.6307		30.5535	18.3635		41.8359	69.2817
1.325	0	0.00832342	0.09375	0	0.0171875	0.00968188	0	0	0.00609756	0	0	0	0.00304878	0	0.00806452				0.00119048	0	0.0167464	0.0188679	0	0	0	0.00414938	0	0	0.00396825	0	0	0		11.2505	3.98476		5.375	8.685	9.404		10.7864	44.8561		194.418	188.608		34.7182	45.7428
1.375	0	0.0439952	0.0892857	0	0.028125	0.0124481	0.00178094	0	0.0182927	0	0	0	0.00304878	0.00512821	0.016129				0.00119048	0	0.0311005	0.0408805	0.00520833	0	0	0.0165975	0	0	0	0	0	0		5.83239	5.68934		6.806	8.64	5.195		16.5446	25.155		147.029			47.7844	81.0359
1.425	0.00216685	0.0808561	0.0669643	0	0.0265625	0	0.00267142	0	0.0182927	0.00487805	0	0	0.00304878	0.0153846	0.0241935				0.00238095	0.00580271	0.0669856	0.0503145	0.0104167	0	0.0178571	0.0207469	0.013624	0	0.00396825	0	0	0.00740741		7.33179	7.26287		11.371	8.823	4.386		-6.72555	246.905
1.475	0.00216685	0.170036	0.0803571	0	0.028125	0.00414938	0.00801425	0	0.00609756	0	0	0.00401606	0.00609756	0.0461538	0.0322581				0.00714286	0.0309478	0.0669856	0.0471698	0.0833333	0	0.0178571	0.026971	0.00817439	0.0148148	0.0178571	0	0	0.00740741		6.77608	7.14506		3.558	4.305	8.661			40.448
1.525	0.0119177	0.158145	0.0491071	0	0.04375	0.0179806	0.0178094	0	0.00609756	0	0	0.00401606	0.00609756	0.0615385	0.0483871				0.00952381	0.0444874	0.076555	0.072327	0.0833333	0	0.0535714	0.0373444	0	0	0.0218254	0	0	0		5.90222	10.5117		7.383	7.599	7.726			75.8636
1.575	0.0346696	0.140309	0.0401786	0	0.0546875	0.00829876	0.030276	0	0.0182927	0	0	0.00803213	0.00914634	0.0410256	0.0322581				0.00952381	0.0793037	0.0837321	0.110063	0.0572917	0.00727273	0.0178571	0.0539419	0.0163488	0.0296296	0.031746	0	0.0214286	0.0148148		2.64765	3.78194		5.608	6.32	8.317			2.9218
1.625	0.0379198	0.0963139	0.0446429	0	0.0546875	0.0055325	0.0632235	0	0.0853659	0.00487805	0.00411523	0.0200803	0.0457317	0.0615385	0.0483871				0.0321429	0.0696325	0.0598086	0.0660377	0.104167	0.04	0.0178571	0.0414938	0.0190736	0.0148148	0.0436508	0.00234192	0.0214286	0		8.73058	4.82794		7.818	8.975	3.345			59.4282
1.675	0.0801733	0.0653983	0.0491071	0	0.06875	0.011065	0.0845948	0.0134048	0.0304878	0	0.0123457	0.0240964	0.0792683	0.0358974	0.0725806				0.0690476	0.116054	0.0598086	0.0440252	0.109375	0.0509091	0.0535714	0.0456432	0.0163488	0.0148148	0.0595238	0.00234192	0.0428571	0.0111111		9.24185			5.589	7.073	5.556
1.725	0.0628386	0.0273484	0.0446429	0.00339559	0.0703125	0.0262794	0.107747	0.0482574	0.0670732	0.0243902	0.0576132	0.0281124	0.070122	0.025641	0.0403226				0.0714286	0.108317	0.0454545	0.0597484	0.0677083	0.0545455	0.0357143	0.0435685	0.0354223	0.0296296	0.0753968	0	0.0428571	0.0148148					6.407	5.581	4.473
1.775	0.0931744	0.0225922	0.0491071	0.00848896	0.0765625	0.0567082	0.0899377	0.105898	0.054878	0.0243902	0.102881	0.0481928	0.115854	0.0358974	0.0403226				0.097619	0.0560928	0.0334928	0.0377358	0.0625	0.0581818	0.0714286	0.0394191	0.0408719	0.037037	0.093254	0.0140515	0.0857143	0.00740741					5.234	6.015	5.129
1.825	0.0888407	0.0107015	0.0446429	0.00509338	0.065625	0.0733057	0.104185	0.155496	0.097561	0.0439024	0.131687	0.0401606	0.131098	0.0358974	0.0806452				0.12381	0.0715667	0.0287081	0.0377358	0.0572917	0.0654545	0.0357143	0.0456432	0.13624	0.0518519	0.109127	0.0327869	0.0642857	0.0148148					6.285	8.456	3.383
1.875	0.0758397	0.0166468	0.0267857	0.0203735	0.0640625	0.106501	0.09439	0.175603	0.109756	0.0439024	0.160494	0.0441767	0.112805	0.0461538	0.0322581				0.0797619	0.0676983	0.0239234	0.0283019	0.046875	0.0545455	0.0714286	0.0414938	0.147139	0.0518519	0.0813492	0.0351288	0.114286	0.0111111					5.534	8.329	5.509
1.925	0.0693391	0.00713436	0.00892857	0.0322581	0.0421875	0.125864	0.0667854	0.127346	0.0731707	0.112195	0.111111	0.0481928	0.10061	0.0358974	0.0322581				0.0761905	0.0425532	0.0406699	0.0503145	0.0416667	0.0836364	0.0178571	0.0311203	0.119891	0.037037	0.0892857	0.058548	0.142857	0.0185185					6.396	8.832	7.979
1.975	0.0736728	0.00475624	0.0267857	0.0594228	0.05	0.134163	0.0569902	0.104558	0.0487805	0.185366	0.102881	0.0682731	0.070122	0.025641	0.0241935				0.0702381	0.040619	0.0239234	0.0251572	0.0104167	0.0654545	0.0892857	0.0435685	0.0926431	0.0296296	0.0595238	0.12178	0.1	0.0111111					9.674	4.134	5.712
2.025	0.0671723	0.00356718	0.0178571	0.0780985	0.0421875	0.109267	0.048976	0.0656836	0.0304878	0.15122	0.090535	0.0562249	0.0609756	0.0358974	0.0322581				0.0607143	0.0367505	0.0143541	0.0408805	0.0104167	0.0436364	0.0357143	0.0456432	0.0790191	0.0888889	0.0436508	0.138173	0.0571429	0.0222222					3.646	3.551	6.084
2.075	0.0606717	0.00118906	0	0.089983	0.021875	0.0829876	0.0480855	0.041555	0.0426829	0.107317	0.0534979	0.0401606	0.0396341	0.0205128	0.0725806				0.0404762	0.040619	0.00956938	0.00943396	0.0260417	0.08	0.0357143	0.0456432	0.0626703	0.0666667	0.047619	0.140515	0.1	0.0555556					8.265	4.333	6.84
2.125	0.0346696	0.00475624	0.0133929	0.135823	0.015625	0.055325	0.0382903	0.0201072	0.0487805	0.136585	0.0288066	0.060241	0.0365854	0.0512821	0.0322581				0.0285714	0.0212766	0.0191388	0.0125786	0.03125	0.105455	0.0178571	0.0497925	0.0435967	0.0666667	0.0496032	0.11007	0.0857143	0.0444444					5.629	3.638	6.311
2.175	0.0433369	0.00713436	0.00446429	0.151104	0.0109375	0.033195	0.0311665	0.0227882	0.0121951	0.0487805	0.0246914	0.0361446	0.0243902	0.0410256	0.0322581				0.0202381	0.0444874	0.0119617	0.0157233	0.0104167	0.08	0.0714286	0.0414938	0.0163488	0.0518519	0.0337302	0.0725995	0.0571429	0.0777778					7.7	5.593	7.788
2.225	0.0292524	0.00713436	0	0.0967742	0.01875	0.0290456	0.0311665	0.00536193	0.0182927	0.0292683	0.0123457	0.0522088	0.00609756	0.0153846	0.0241935				0.0178571	0.0290135	0.0215311	0.00943396	0.03125	0.0618182	0.0357143	0.0414938	0.0190736	0.037037	0.0257937	0.0749415	0.0214286	0.0814815					5.724	5.024	3.392
2.275	0.0368364	0.00713436	0.00446429	0.0831919	0.0140625	0.0179806	0.0231523	0.00938338	0.0243902	0.00487805	0.00823045	0.0522088	0.0121951	0.0410256	0.0483871				0.027381	0.0232108	0.0119617	0.0157233	0.0260417	0.0836364	0.0178571	0.0477178	0.0163488	0.0666667	0.0198413	0.0515222	0.0285714	0.0703704					6.113	5.725	5.21
2.325	0.0184182	0.00713436	0	0.0814941	0.015625	0.00829876	0.0178094	0.0080429	0.0243902	0.0097561	0.00823045	0.0441767	0.00609756	0.0358974	0.0322581				0.0261905	0.00773694	0.0287081	0.0188679	0.00520833	0.0218182	0	0.0352697	0.00817439	0.0222222	0.015873	0.0351288	0.00714286	0.0481481					5.06	3.088	5.077
2.375	0.0216685	0.0059453	0.00446429	0.0458404	0.009375	0.00414938	0.0124666	0.00938338	0.0243902	0.00487805	0.00823045	0.0401606	0.00914634	0.0512821	0				0.0190476	0.0154739	0.0167464	0.0125786	0.015625	0.0254545	0.0178571	0.0290456	0.0108992	0.0888889	0.015873	0.0374707	0.00714286	0.062963					6.948	3.593	6.655
2.425	0.0162514	0.00832342	0	0.0356537	0.015625	0.00691563	0.00801425	0.0107239	0.0121951	0.00487805	0.00411523	0.0441767	0.00914634	0.0307692	0.00806452				0.0202381	0.0193424	0.0119617	0.0220126	0.0104167	0.0109091	0.0535714	0.0394191	0	0.0518519	0.00992063	0.0327869	0	0.0592593					5.781	4.888	7.83
2.475	0.00866739	0.0118906	0.00892857	0.0152801	0.015625	0.00138313	0.0062333	0.0134048	0.0182927	0	0.00823045	0.0522088	0.00609756	0.0307692	0.00806452				0.0261905	0.00193424	0.0287081	0.0188679	0.0260417	0.00727273	0.0357143	0.026971	0.0027248	0.0148148	0.00198413	0.0163934	0	0.0592593					6.286	4.3	5.538
2.525	0.00325027	0.00475624	0	0.0135823	0.015625	0.00414938	0	0.0187668	0.0121951	0	0.00411523	0.0401606	0	0.0564103	0.016129				0.0130952	0.00386847	0.0263158	0.00628931	0.03125	0	0.0178571	0.0145228	0.00544959	0.0666667	0.00198413	0.0117096	0	0.0703704					9.079	5.589	2.659
2.575	0.00650054	0.0142687	0.00446429	0.0152801	0.00625	0.00414938	0.00178094	0.00670241	0.0243902	0	0.00411523	0.0321285	0.00609756	0.025641	0.016129				0.0178571	0.00386847	0.0287081	0.0125786	0.00520833	0	0.0178571	0.0248963	0.00544959	0.0222222	0	0.00468384	0	0.0518519					3.538	4.19	6.985
2.625	0.00650054	0.00713436	0	0.0118846	0.009375	0.00276625	0.00267142	0.00670241	0.00609756	0.00487805	0.00411523	0.0281124	0.00304878	0.0102564	0.016129				0.0107143	0.00386847	0.00956938	0.00943396	0.0104167	0	0	0.0124481	0.0108992	0.0148148	0	0.00468384	0	0.0407407					10.593	6.222	9.271
2.675	0.00433369	0.00832342	0	0.00339559	0.0125	0.00691563	0.000890472	0.00536193	0	0.0097561	0.00411523	0.0321285	0	0.0153846	0.016129				0.00952381	0.00386847	0.0287081	0.00628931	0.00520833	0	0	0.0186722	0.0190736	0.0148148	0.00396825	0.00234192	0	0.0481481					5.488	4.1	3.963
2.725	0.00433369	0.0118906	0.00892857	0.00679117	0.0171875	0.00829876	0	0.0080429	0.0121951	0.00487805	0.0123457	0.0160643	0.00304878	0.025641	0.016129				0.00357143	0.00386847	0.0191388	0.0220126	0	0	0.0535714	0.0103734	0.0108992	0	0.00198413	0	0	0.0222222					12.934	5.802	4.216
2.775	0	0.00475624	0	0.00509338	0.0046875	0.0055325	0	0.00134048	0.00609756	0.0097561	0.00823045	0.0200803	0	0.0153846	0.00806452				0.00357143	0.00386847	0.0119617	0.00943396	0	0	0.0535714	0.00414938	0.00817439	0.00740741	0.00992063	0	0	0.0296296					7.655	9.261	8.13
2.825	0.00325027	0.00713436	0.00892857	0	0.0046875	0.00829876	0	0.00670241	0.00609756	0.0146341	0.00823045	0.00803213	0.00609756	0.0102564	0.00806452				0.00238095	0.00193424	0.0143541	0.0157233	0	0	0.0178571	0.00414938	0.00544959	0.00740741	0.00396825	0	0	0.0222222					5.781	8.29	7.529
2.875	0.00216685	0.00832342	0	0.00169779	0.0078125	0.0055325	0	0.00134048	0	0.00487805	0.00823045	0.00401606	0.00609756	0.0102564	0				0.00119048	0.00193424	0.00717703	0.0125786	0.0104167	0	0	0.00829876	0.00544959	0	0.00595238	0	0	0.00740741					5.981	7.084	7.467
2.925	0	0.00713436	0.00446429	0	0.0109375	0.00276625	0	0.00402145	0	0.00487805	0.00823045	0.00401606	0.00304878	0.00512821	0				0	0	0.00717703	0.00943396	0.00520833	0	0.0178571	0.00207469	0.0163488	0	0.00595238	0	0	0.00740741					4.72	7.455	3.227
2.975	0	0.00475624	0	0	0.009375	0.00414938	0.000890472	0.00402145	0	0	0.00823045	0	0.00304878	0	0				0	0	0.00956938	0.00314465	0	0	0	0.00207469	0.00817439	0	0.00793651	0	0	0					6.886	8.307	5.252
																																					5.836	7.417	4.132
																																					6.372	7.849	5.024
																																					9.287	3.449	3.3
																																					4.233	6.472	4.577
																																					4.421	5.223	7.132
																																					4.348	8.022	5.303
																																					4.16	6.364	5.532
																																					3.05	5.186	6.448
																																						3.477	5.338	5.457
																																						3.717	7.457	7.587
																																						3.865	7.715	3.27
																																						4.006	7.666	5.032
																																						3.377	3.701	4.501
																																						2.931	3.844	5.298
																																						2.56	4.295	7.466
																																						2.175	3.603	5.048
																																						2.278	4.205	2.734
																																						2.102	4.866	6.898
																																						1.936	4.825	9.284
																																						4.34	2.829	3.296
																																						5.304	3.155	4.084
																																						6.017	4.207	7.957
																																						6.551	3.687	7.537
																																						7.104	5.005	7.19
																																						7.078	4.045	3.198
																																						6.951	5.69	4.93
																																						6.82	3.706	4.023
																																						6.053	5.304	5.248
																																						5.336	8.802	3.293
																																						4.736	9.048	3.864
																																						4.352	6.832	6.8
																																						3.825	7.305	5.229
																																						3.841	7.917	5.246
																																						3.881	7.14	6.369
																																						3.833	7.743	5.044
																																						3.635	2.87	7.514
																																						2.873	6.303	3.175
																																						2.807	4.694	4.958
																																						2.757	7.572	4.168
																																						3.704	6.142	4.505
																																						3.534	5.103	7.279
																																						3.473	5.131	4.806
																																						3.498	7.011	2.878
																																						2.452	7.61	6.909
																																						2.523	6.971	9.297
																																						2.49	3.429	3.013
																																						2.336	3.778	3.984
																																						1.956	4.206	7.858
																																						2.097	3.423	7.741
																																						2.093	3.66	7.065
																																						1.994	4.433	3.38
																																						1.736	3.785	4.292
																																						1.952	2.675	3.99
																																						2.018	2.791	5.6
																																						2.049	4.049	3.308
																																						3.512	3.377	3.467
																																						3.762	4.603	6.599
																																						3.688	3.767	5.134
																																						3.674	5.243	5.067
																																						10.758	3.275	6.288
																																						10.037	4.798	4.782
																																						9.743	8.464	7.497
																																						9.486	8.966	--
																																						8.324	6.514	--
																																						7.992	7.285	--
																																						7.827	7.486	--
																																						7.784	7.056	--
																																						4.324	7.558	--
																																						3.545	2.587	--
																																						3.141	5.542
																																						2.872	4.369
																																						4.58	7.306
																																						4.417	5.904
																																						4.398	5.121
																																						4.407	5.12
																																						7.613	6.746
																																						7.375	7.425
																																						7.307	6.7
																																						7.185	3.446
																																						4.429	2.717
																																						4.616	4.175
																																						4.796	3.401
																																						4.842	3.52
																																						7.402	4.086
																																						6.468	3.176
																																						5.966	2.678
																																						5.575	2.394
																																						6.688	3.97
																																						6.006	3.172
																																						5.607	4.295
																																						5.385	--
																																						4.115	--
																																						4.174	--
																																						4.206	--
																																						4.1	--
																																						3.834	--
																																						3.619	--
																																						3.535	--
																																						3.467	--
																																						3.196	--
																																						3.488	--
																																						3.507
																																						3.478
																																						4.568
																																						4.328
																																						4.321
																																						4.312
																																						3.151
																																						3.169
																																						3.126
																																						3.093
																																						3.147
																																						3.121
																																						3.037
																																						2.961
																																						3.918
																																						3.716
																																						3.966
																																						4.102
																																						4.259
																																						4.005
																																						3.969
																																						4
																																						7.586
																																						7.618
																																						7.809
																																						8.161
																																						10.981
																																						9.568
																																						8.907
																																						8.41
																																						7.274
																																						6.803
																																						6.545
																																						6.395
																																						7.257
																																						7.002
																																						6.88
																																						6.824
																																						5.438
																																						4.686
																																						4.398
																																						4.169
																																						2.807
																																						2.647
																																						2.589
																																						2.481
[truncated: 10 more columns]
