# Supplementary material for: Acquisition of innate odor preference depends on spontaneous and experiential activities during critical period
Source: eLife. 2021 Mar 26;10:e60546. doi: 10.7554/eLife.60546 (PMC8032394; doi:10.7554/eLife.60546)
Supplement: Figure 2—figure supplement 1—source data 1. [file elife-60546-fig2-figsupp1-data1.xlsx]

## Sheet: Sheet1
	Figure 2Biii PID readout
	Distance (cm)	readout1	readout2	readout3
	0	1.857	1.597
	1	0.4889	0.6473	0.5606
	2	0.3004	0.3662
	3	0.163	0.1715	0.1773
	4	0.072	0.1025
	5	0.0598	0.0317
	6	0.0421	0.0317
