# Supplementary material for: Acquisition of innate odor preference depends on spontaneous and experiential activities during critical period
Source: eLife. 2021 Mar 26;10:e60546. doi: 10.7554/eLife.60546 (PMC8032394; doi:10.7554/eLife.60546)
Supplement: Figure 2—source data 1. [file elife-60546-fig2-data1.xlsx]

## Sheet: Sheet1
Figure2C PEA innate behavior for PEA Exposured					Figure2D IAMM innate behavior for PEA Exposured						Figure2D TMA innate behavior for TMA/PB Exposured						Figure2D PB innate behavior for TMA/PB Exposured
PEA					IAMM						IAMM						Peanut Butter
Ctrl	PEA_P0-14	PEA24-38			Ctrl	PEA_P0-14	PEA24-38				Ctrl	PB_P0-14	TMA_P0-14				Ctrl	PB_P0-14	TMA_P0-14
1.40069	83.5613	-149.793			84.6859	28.403	-122.615				217.65	-97.519	-26.9249				253.521	192.962	972.107
125.413	171.097	-35.932			-140.106	18.0386	-132.623				165.089	71.1827	227.84				288.399	189.555	266.667
69.543	145.874	-206.069			87.5579	163.425	-29.6347				40.6723	-41.8857	391.131				277.454	52.0533	120.793
-89.8882	-19.049	345.192			22.1117	-166.192	17.0725				363.164	15.9779	136.253				166.862	189.882	169.798
-54.1805	364.74	-44.8147			-111.824	-200.207	-205.871				350.1	147.229	-44.3468				882.843	557.537	593.81
-150.928	76.7223	90.8974			-17.3652	-78.4046	50.7809				38.6208	-37.5086	28.01				381.38	267.083	792.041
-17.737	349.413	356.734			212.078	59.3955	-228.965				38.6208	141.359	34.9044				1507.17	303.434	862.871
	89.1931	-40.3292			-108.47	-85.5189	19.0737				61.371	24.9801	105.283				-6.49789	0.0265	127.801
	-73.9635	-223.49				69.8579	-154.431					-11.4802					1743.44	436.75
	87.2991	-242.513					272.616					-54.7728					576.978	194.062
												-166.194					274.556	169.239
