# Supplementary material for: Acquisition of innate odor preference depends on spontaneous and experiential activities during critical period
Source: eLife. 2021 Mar 26;10:e60546. doi: 10.7554/eLife.60546 (PMC8032394; doi:10.7554/eLife.60546)
Supplement: Figure 3—source data 1. [file elife-60546-fig3-data1.xlsx]

## Sheet: Sheet1
	Figure 3ATaar4 glomerulus counts for KIR2.1_off					Figure 3B Taar4 glomerulus counts for PEA_P0-14					Figure 3B MOR28 glomerulus counts for PEA_P0-14
	Ctrl	KIR2.1-off				CD1_Ctrl	P0-P14_PEA	P24-38_PEA			CD1_Ctrl	P0-P14_PEA	P24-38_PEA
	2	6				3	5	4			2	2	2
	2	6				2	8	4			2	2	2
	1	3				3	5	2			2	2	2
	2	2				3	3	3			3	3	3
	2	7				2	5	3			2	2	2
	2	8				3	5	2			2	2	2
	2					4	6				2	--	2
							3					--	2
							7					--	2
												--	2
												--	2
												--	3
												--	2
