# Supplementary material for: Acquisition of innate odor preference depends on spontaneous and experiential activities during critical period
Source: eLife. 2021 Mar 26;10:e60546. doi: 10.7554/eLife.60546 (PMC8032394; doi:10.7554/eLife.60546)
Supplement: Figure 4—figure supplement 1—source data 1. [file elife-60546-fig4-figsupp1-data1.xlsx]

## Sheet: Sheet1
Figure 4–figure supplement 1A																			Figure 4–figure supplement 1C						Figure 4–figure supplement 1D						Figure 4–figure supplement 1E				Figure 4–figure supplement 1F
E-9			E-8			E-7			E-6			E-5			E-4				E-13			E-12			E-12			E-11			Ctrl	KIR2.1-off			116.6	54.8416
Ctrl	KIR2.1-off		Ctrl	KIR2.1-off		Ctrl	KIR2.1-off		Ctrl	KIR2.1-off		Ctrl	KIR2.1-off		Ctrl	KIR2.1-off			Ctrl	KIR2.1-off		Ctrl	KIR2.1-off		Ctrl	KIR2.1-off		Ctrl	KIR2.1-off		-11.1381	142.731			43.8873	0
-26.5153	27.5556		-131.567	-121.884		-24.3456	123.022		72.1129	165.666		148.289	155.291		14.8845	10.5447			196.033	-31.1582		23.3646	-86.2113		0.17336	0.80847		1	-0.31056		143.856	328.858			-232.613	56.574
-47.4088	-117.202		-188.995	-192.407		119.445	41.1625		76.105	54.1516		248.744	75.7652		170.956	15.9097			239.475	193.373		-72.8083	206.808		0.25405	-0.07395		0.53954	0.68195		479.683	-2.89477			-134.927	0
80.0502	19.0987		-139.437	-81.9792		238.291	74.7759		411.633	35.3968		247.747	58.6508		86.5878	26.7196			-186.21	101.816		1.99369	-55.5361		0.10151	0.25582		0.13306	0.11479		0	183.865			166.897	63.0233
22.2265	-19.9674		58.4141	-135.431		14.1806	-119.998		156.831	-1.12174		44.6203	50.0575		23.5349	139.142			291.917	244.246		-65.7279	183.819		-0.07217	0.29115		0.06073	-0.21602		248.634	-18.2463			-22.0337	214.302
58.9107	71.5283		-76.1641	71.6444		-32.0387	-47.6082		11.2484	34.4215		30.6775	128.463		29.8984	175.329			56.9147	154.541		100.809	35.891		-0.17073	0.47816		-0.13892	-0.29147		0.41096	240.421			86.5499	9.30299
0	236.101		595.168	-6.04966		-36.432	88.7333		15.8224	3.69853		109.875	24.4406		18.4832	33.7626			428.771	27.5058		88.305	152.184		-0.19387	0.29663		0.00955	-0.12078		520.209	60.4493			718.554	336.983
-170.826	-19.9674		-2.44159	-135.431		19.2329	-119.998		49.4841	28.2586		20.2355	89.0713		20.493	86.4326			-202.195	86.7912		243.073	-31.9502		0.29868	0.11736		-0.04013	-0.02238		107.545				102.133	-26.5341
--	-7.10128		--	-26.1924		--	154.427		48.5953	25.6304		97.9836	49.1427		27.6388	30.2832			66.4979	77.0816		83.9944	377.3		0.13256	0.05167		0.7308	0.41678		6.51341				376.109	336.983
	-265.18			623.776			0		40.9786	79.9885		14.9897	44.8258		58.2599	45.0175			456.636	134.119		194.603	139.584		0.86561	0.2056		0.39554	0.08369						457.555	591.611
	-3.55064			-13.0962			77.2135												182.209	22.5907		-0.78201	-44.0202		0	0.91315		0.11618	0						787.009	110.879
	--																			12.0067			159.212		-0.1418	0.07872		-0.01398	0.44562
																				235.947			-13.1656		0.55469	0.09455		0.69602	0.16718
																									0.5682	0.25424		0.01282	0.3641
																									0.61497	0.06464		-0.20025	0.48865
																									0.12685	-0.06408		0.31773	0.9423
																									-0.1677	-0.55153		0.1082	0.41343
																									0.06627	0.36368		-0.02878	0.02851
																										-0.12638			-0.17503
																										-0.13084			-0.13967
		--	--
