# Supplementary material for: Acquisition of innate odor preference depends on spontaneous and experiential activities during critical period
Source: eLife. 2021 Mar 26;10:e60546. doi: 10.7554/eLife.60546 (PMC8032394; doi:10.7554/eLife.60546)
Supplement: Figure 4—source data 1. [file elife-60546-fig4-data1.xlsx]

## Sheet: Sheet1
Figure 4Ai Dishabituation for threshold detection of AA																			Figure 4B Go/Nogo for threshold detection of AA																		Figure 4D Crosshabituation for odor discrimination
		e-8			e-7			3e-07			e-6			e-5			e-4		2.5e-08			2.5e-07			2.5e-06			2.5e-05			0.00025			0.0025				AA/HPH			HXH/HXO			PTO/VAH			BAE/HPO
	Ctrl	KIR2.1-off		Ctrl	KIR2.1-off		Ctrl	KIR2.1-off		Ctrl	KIR2.1-off		Ctrl	KIR2.1-off		Ctrl	KIR2.1-off		Ctrl	KIR2.1-off		Ctrl	KIR2.1-off		Ctrl	KIR2.1-off		Ctrl	KIR2.1-off		Ctrl	KIR2.1-off		Ctrl	KIR2.1-off		Ctrl	KIR2.1-off		Ctrl	KIR2.1-off		Ctrl	KIR2.1-off		Ctrl	KIR2.1-off		Ctrl
	-0.02051	0.17427		0.12506	-0.19366		-0.0879	-0.02428		0.14298	0		122.622	72.121		110.782	103.598		48.3333	51.6667		55.1724	42.1053		55.9322	71.9298		80.7018	94.9153		85.9649	98.3333		93.8775	95.7447		58.289	-145.49		-6.72272	52.8513		27.5743	29.6388		-49.0744	70.5284		28.9642
	0	0.1255		0.14576	0.08065		0.05992	0.16297		0	0.29075		36.152	114.707		108.027	113.465		48.3333	53.7037		50.8772	50		88.3333	56.7568		84.4828	84.7458		94.8276	90		96.6667	84.0909		117.084	124.611		2.24638	58.9746		35.6453	113.607		19.2794	98.7631		78.173
	0.02193	-0.2273		-0.00397	0.01058		0.02786	0.10797		0.08899	-0.12185		53.661	126.575		148.622	188.928		44.8276	47.0588		57.5	53.3333		53.3333	68.3333		81.6667	91.6667		92.7273	93.617		91.6667	95		0	146.532		118.582	-3.91653		8.15912	11.7192		-0.07084	31.5158		-0.34699
	0.07054	0.06765		0.04457	0.04248		-0.07817	0.05377		0.11332	0.03685		315.833	86.6258		146.093	40.098		50	45		48.3333	51.7857		69.6429	71.9298		80	91.6667		100	100		100	95		13.2199	-7.98347		30.5435	14.6392		7.14664	83.9465		6.92358	2.31459		81.4144
	0.00478	-0.18384		-0.02405	0.45555		-0.12721	-0.013		-0.1529	-0.0487		69.5996	83.3745		39.2441	73.5029		55	46.5517		51.6667	58.6957		73.3333	73.3333		88.1356	71.9298		86.6667	95		95	83.3333		69.0023	39.5599		64.4118	130.881		108.959	46.9804		182.327	95.4867		52.252
	-0.01639	-0.0852		-0.09967	-0.00596		-0.02041	0.27112		0.16434	0.09341		178.553	68.5458		358.5	72.4376		50.8772	50		50.9091	44.0678		65.2174	86.6667		93.75	94.8276		96.4286	83.9286		85	98.3333		53.8427	-22.1261		76.7844	227.847		89.7454	29.9007		-28.3442			109.525
	-0.0929	0.00936		-0.45621	-0.11331		-0.03614	0.15344		0.28095	0.19796		104.046	203.795		43.5881	195.976		46.6667	46.6667		48.1482	50.8475		76.6667	53.3333			79.661		85	95		92.8571	91.0714		13.8119	53.6307		30.5535	18.3635		41.8359	69.2817		138.803			21.579
		-0.0085			-0.34257		0.10591	0.01033			0.36702		101.736	55.2192		44.2841	136.874			51.6667		50				67.2414			90.9091		92	94.4444		96.6667			10.7864	44.8561		194.418	188.608		34.7182	45.7428		31.5687			-200.844
							0.35834	-0.03029					147.55			184.462				51.6667																	16.5446	25.155		147.029			47.7844	81.0359		44.0462			101.377
							0.32163	-0.36041																													-6.72555	246.905
							-0.14362																															40.448
							0																															75.8636
							0.20569																															2.9218
																																						59.4282
[truncated: 33 more columns]
