# Supplementary material for: Acquisition of innate odor preference depends on spontaneous and experiential activities during critical period
Source: eLife. 2021 Mar 26;10:e60546. doi: 10.7554/eLife.60546 (PMC8032394; doi:10.7554/eLife.60546)
Supplement: Figure 5—figure supplement 1—source data 1. [file elife-60546-fig5-figsupp1-data1.xlsx]

## Sheet: Sheet1
	Figure 5–figure supplement 1B Quantification of the overlap between NCAM signals and M72
	Ctrl	KIR2.1_off
	0.946	0.178
	0.966	0.066
	0.873	0.299
		0.074
	--	0.512
	--	0.218
	--	0.887
	--	0.146
	--	0.829
	--	0.092
	--
	--
