# Supplementary material for: Acquisition of innate odor preference depends on spontaneous and experiential activities during critical period
Source: eLife. 2021 Mar 26;10:e60546. doi: 10.7554/eLife.60546 (PMC8032394; doi:10.7554/eLife.60546)
Supplement: Figure 5—source data 1. [file elife-60546-fig5-data1.xlsx]

## Sheet: Sheet1
Figure 5Bv overlap between OMP signals and M72					Figure 5Bvi glomeulus size compare						Figure 5C iv Glomerular occupancy by OSN axons																							Figure 5D iv Glomerular occupancy by mitral cell dendrites
Ctrl	KIR2.1-off				Ctrl	KIR2.1-off
0.991	0.632				5307.74	2748.35					Filter Radius	1	2	3	4	5	6	7	8	9	10	11	12	13	14	15	16	17	18	19	20			Filter Radius	1	2	3	4	5	6	7	8	9	10	11	12	13	14	15
0.948	0.497				5540.06	6654.42					WT																							WT	0.247	0.3863	0.5084	0.6087	0.6901	0.7536	0.8022	0.8416	0.8747	0.9022	0.9237	0.9415	0.9559	0.9669	0.9745
0.925	0.315				5578	2030.48						0.9307	0.9635	0.9819	0.9924	0.9978	0.9998	1	1	1	1	1	1	1	1	1	1	1	1	1	1				0.3465	0.4956	0.6113	0.6919	0.7509	0.7968	0.8335	0.8618	0.8843	0.9026	0.9181	0.9318	0.9438	0.9535	0.9605
0.961	0.565				3741.13	2071.52						0.9517	0.9807	0.9933	0.9991	1	1	1	1	1	1	1	1	1	1	1	1	1	1	1	1				0.2462	0.3542	0.4491	0.528	0.5947	0.6536	0.7031	0.7452	0.7793	0.8071	0.8302	0.8508	0.8696	0.8862	0.9014
0.939	0.617				4273.14	9779.12						0.5155	0.5965	0.6674	0.7272	0.776	0.8162	0.8511	0.8812	0.9075	0.9283	0.9442	0.9571	0.9679	0.9762	0.9824	0.9874	0.9913	0.9944	0.9969	0.9983				0.3567	0.4903	0.5977	0.6782	0.7418	0.7918	0.8302	0.861	0.8862	0.9058	0.9219	0.9348	0.9454	0.9544	0.9615
0.942	0.593				6463.92	1881.02						0.9428	0.9763	0.9924	0.998	0.9997	1	1	1	1	1	1	1	1	1	1	1	1	1	1	1				0.2589	0.3737	0.4745	0.5615	0.6383	0.7051	0.7623	0.8118	0.8553	0.8912	0.9206	0.9448	0.9616	0.9732	0.9816
	0.819				5207.84	1592.94						0.748	0.8102	0.859	0.8971	0.9284	0.9503	0.9669	0.9784	0.9874	0.9933	0.9969	0.999	0.9998	1	1	1	1	1	1	1				0.2278	0.3347	0.4313	0.5116	0.5793	0.6389	0.6885	0.7282	0.7597	0.7869	0.8098	0.8295	0.8466	0.8619	0.8751
	0.557				1088.03	5159.83						0.9452	0.9667	0.9802	0.9873	0.992	0.9956	0.9981	0.9997	1	1	1	1	1	1	1	1	1	1	1	1				0.3135	0.463	0.593	0.6958	0.7745	0.8325	0.875	0.9065	0.9297	0.9476	0.9618	0.9725	0.9802	0.9861	0.9908
	0.174				4393.95	7905.08						0.9477	0.9684	0.9821	0.9909	0.9957	0.9982	0.9993	0.9998	1	1	1	1	1	1	1	1	1	1	1	1				0.3846	0.5861	0.7376	0.8364	0.9002	0.9408	0.9665	0.9814	0.9903	0.9945	0.9969	0.9983	0.9988	0.9992	0.9996
	0.633				2674	1552.67						0.9627	0.9844	0.994	0.9977	0.9991	0.9998	1	1	1	1	1	1	1	1	1	1	1	1	1	1				0.1598	0.2729	0.3819	0.4795	0.564	0.6365	0.6987	0.7497	0.7916	0.826	0.857	0.8847	0.9099	0.9288	0.9441
	0.566				3779.07	9171.22						0.9508	0.9865	0.9978	0.9993	0.9998	1	1	1	1	1	1	1	1	1	1	1	1	1	1	1				0.192	0.3091	0.4183	0.5118	0.5898	0.652	0.7005	0.7372	0.7671	0.7928	0.8161	0.8375	0.8563	0.873	0.8878
	0.65				1727.69	2642.25						0.9623	0.9873	0.9965	0.9996	1	1	1	1	1	1	1	1	1	1	1	1	1	1	1	1				0.2535	0.3687	0.4732	0.5608	0.6349	0.6984	0.7481	0.7869	0.8182	0.8441	0.8661	0.8846	0.9003	0.9134	0.9247
	0.819				4996.43	3794.56																													0.3443	0.5393	0.6931	0.7945	0.8581	0.8976	0.9262	0.9474	0.9656	0.9793	0.989	0.9957	0.9988	0.9998	1
	0.229				2934.2	2101.72					KIR2.1																								0.3037	0.4732	0.6175	0.7287	0.809	0.8632	0.9012	0.9262	0.9435	0.9563	0.9664	0.9742	0.9798	0.9839	0.9873
	0.312				4590.64	1757.11						0.03172	0.05096	0.06947	0.08825	0.1081	0.1287	0.1497	0.1715	0.1945	0.2183	0.2428	0.2682	0.2945	0.3215	0.3493	0.3771	0.4043	0.4308	0.4557	0.4802				0.4302	0.6037	0.7237	0.7998	0.8455	0.8791	0.9079	0.9339	0.9558	0.973	0.9861	0.9953	0.9992	0.9999	1
	0.838				2319.33	1630.11						0.6553	0.7088	0.75	0.7849	0.8169	0.8449	0.8688	0.89	0.9089	0.9252	0.9388	0.9499	0.9598	0.9688	0.9769	0.9839	0.9897	0.9942	0.9974	0.9991				0.2905	0.421	0.5387	0.6352	0.7096	0.7674	0.8125	0.8489	0.8783	0.9019	0.9211	0.9365	0.9488	0.9586	0.9658
	0.485				3721.77	1797.38						0.07812	0.1573	0.2372	0.3116	0.379	0.4395	0.4928	0.5392	0.582	0.6211	0.6569	0.6903	0.7219	0.7512	0.7792	0.8045	0.8276	0.849	0.8683	0.8863				0.2161	0.36	0.4848	0.5782	0.6512	0.7087	0.7542	0.7906	0.8185	0.839	0.8552	0.8683	0.8798	0.89	0.899
	0.725				2803.33	9097.65						0.1767	0.2513	0.3161	0.3699	0.4169	0.4589	0.4969	0.5324	0.565	0.5953	0.6239	0.651	0.6765	0.7005	0.723	0.7442	0.7646	0.7838	0.8016	0.8184				0.2153	0.3469	0.4647	0.5599	0.636	0.7005	0.7558	0.8024	0.8404	0.8688	0.8913	0.9097	0.924	0.936	0.9469
	0.278				4265.4	5463.39						0.1287	0.2247	0.3172	0.4004	0.4743	0.5375	0.592	0.6392	0.6798	0.7134	0.7428	0.7692	0.7927	0.8137	0.8324	0.8496	0.8656	0.8804	0.894	0.9064				0.3502	0.48	0.5893	0.6717	0.7382	0.7918	0.8334	0.8659	0.89	0.9083	0.9237	0.9356	0.9453	0.9532	0.9597
	0.863				2299.19	4307.99						0.2037	0.2817	0.351	0.4093	0.4606	0.5083	0.5495	0.5861	0.6202	0.6505	0.6792	0.706	0.7319	0.7572	0.782	0.8065	0.8297	0.851	0.8691	0.885				0.2888	0.4319	0.5616	0.665	0.7478	0.813	0.8628	0.9007	0.9282	0.9479	0.9623	0.9734	0.9815	0.9874	0.9914
	0.119				3705.5	10739.4						0.1133	0.2163	0.315	0.4039	0.4805	0.5437	0.5951	0.6386	0.6765	0.7074	0.7335	0.7579	0.7816	0.8043	0.8259	0.8448	0.8624	0.8786	0.8941	0.9088				0.3295	0.4918	0.618	0.7102	0.7778	0.8286	0.8683	0.8978	0.921	0.9384	0.9516	0.9617	0.9685	0.9739	0.978
	0.892				2505.96	3192.85						0.1958	0.2717	0.3382	0.3954	0.4434	0.4859	0.5243	0.559	0.5908	0.6201	0.6466	0.6703	0.6917	0.7118	0.7312	0.7492	0.7657	0.7809	0.7954	0.8092				0.1917	0.3365	0.4778	0.606	0.7145	0.7995	0.8652	0.9123	0.945	0.9674	0.9836	0.9936	0.9978	0.9995	0.9999
	0.072				929.28	4961.58						0.1219	0.161	0.2001	0.2373	0.2727	0.3062	0.3392	0.371	0.4019	0.4306	0.4575	0.4823	0.5058	0.5282	0.5502	0.5717	0.5923	0.6122	0.6311	0.6485				0.1401	0.2383	0.3421	0.4399	0.5298	0.6082	0.6805	0.7457	0.8012	0.8485	0.8875	0.9199	0.9436	0.9595	0.9705
	0.146				4408.66	3219.18						0.2205	0.3414	0.4452	0.5261	0.5921	0.65	0.7015	0.7463	0.7846	0.8189	0.8509	0.8786	0.9011	0.918	0.9311	0.942	0.9503	0.9559	0.9598	0.9632				0.1675	0.2936	0.4215	0.5284	0.6165	0.6903	0.7541	0.8061	0.8461	0.8774	0.8999	0.9174	0.9301	0.9415	0.9518
	0.217				2927.23	6323.75						0.03218	0.04854	0.06505	0.08069	0.09549	0.1095	0.1231	0.1365	0.1498	0.1628	0.1759	0.1889	0.2017	0.2139	0.2257	0.2371	0.2482	0.2591	0.2699	0.2807				0.08468	0.1471	0.2153	0.2831	0.3474	0.4093	0.467	0.5211	0.5695	0.6125	0.6523	0.6873	0.7189	0.7482	0.7739
	0.055				1417.93	3588.57						0.4319	0.5147	0.5816	0.6327	0.6742	0.7085	0.7373	0.762	0.7823	0.7991	0.813	0.8249	0.8356	0.8441	0.8521	0.8599	0.8675	0.8747	0.8817	0.8879				0.3486	0.514	0.6589	0.7715	0.8523	0.9065	0.9371	0.9562	0.9705	0.9796	0.9861	0.9913	0.9952	0.9977	0.9988
	0.083				5394.47	3617.22						0.3322	0.4274	0.5167	0.5951	0.6607	0.7178	0.7677	0.8111	0.847	0.878	0.9044	0.9254	0.9415	0.9546	0.9652	0.9737	0.9805	0.9855	0.9889	0.9914				0.2058	0.3352	0.459	0.566	0.6524	0.7192	0.7738	0.8182	0.8522	0.8802	0.9018	0.9178	0.9306	0.9416	0.9484
					3209.89	2906.32						0.1851	0.199	0.2131	0.2268	0.2401	0.2527	0.264	0.2746	0.2847	0.2945	0.3039	0.3131	0.3221	0.3307	0.339	0.3472	0.3552	0.3632	0.371	0.3787				0.1971	0.2718	0.3417	0.4019	0.4546	0.5017	0.5446	0.5843	0.6208	0.654	0.6831	0.7094	0.7334	0.7558	0.7769
					3506.48	2980.67						0.2336	0.2884	0.3427	0.3919	0.4349	0.473	0.5049	0.5302	0.5511	0.5689	0.5843	0.5981	0.6115	0.624	0.6357	0.6468	0.6574	0.6675	0.6772	0.6868				0.192	0.3272	0.4594	0.5732	0.6671	0.7415	0.8001	0.8467	0.8852	0.9148	0.9373	0.9519	0.9617	0.9689	0.9745
					1715.3	4143.04						0.2323	0.258	0.2819	0.304	0.3245	0.3438	0.3619	0.3789	0.3948	0.4101	0.4249	0.4389	0.4526	0.4656	0.4782	0.4906	0.5028	0.5143	0.5256	0.5369				0.1643	0.2915	0.4201	0.5359	0.6329	0.7118	0.7766	0.8266	0.8673	0.8972	0.9213	0.9403	0.9555	0.9674	0.9768
					1801.25	1839.97						0.3691	0.4382	0.4985	0.5505	0.5967	0.6385	0.675	0.7069	0.7338	0.7568	0.7778	0.796	0.8109	0.8239	0.8353	0.846	0.8563	0.866	0.8746	0.8825				0.24	0.3678	0.4881	0.5916	0.6771	0.7444	0.7962	0.8354	0.8665	0.892	0.9131	0.9309	0.9454	0.9573	0.9667
					7740.9	1914.32						0.1231	0.1869	0.2428	0.2917	0.3342	0.3702	0.3999	0.4259	0.4496	0.4718	0.493	0.5135	0.5334	0.5517	0.5691	0.5862	0.6024	0.6179	0.6321	0.6449				0.2107	0.3499	0.4819	0.5962	0.6916	0.7656	0.8228	0.8655	0.8989	0.9259	0.9464	0.9593	0.9677	0.9744	0.9794
					6497.22	3906.07						0.00725	0.016	0.02636	0.03767	0.04836	0.05895	0.06995	0.08096	0.09231	0.1041	0.1159	0.1275	0.1387	0.1497	0.161	0.1724	0.1842	0.1959	0.2076	0.2197				0.2107	0.3398	0.4617	0.5645	0.6499	0.7197	0.7749	0.8199	0.8572	0.8885	0.9132	0.9346	0.9511	0.9623	0.9712
					5200.87	1896.51						0.04315	0.08224	0.1235	0.1652	0.2068	0.2481	0.2888	0.3288	0.3677	0.4056	0.4416	0.4764	0.5098	0.5418	0.5723	0.6007	0.6257	0.6486	0.67	0.6895				0.2591	0.3926	0.514	0.6177	0.7034	0.7695	0.8198	0.8606	0.895	0.9214	0.9413	0.9558	0.9671	0.9768	0.9849
					1779.57	4119.03						0.05327	0.0985	0.1457	0.1904	0.2318	0.2694	0.3033	0.3349	0.3651	0.3926	0.4182	0.4428	0.4671	0.4903	0.5127	0.5341	0.5547	0.5746	0.5938	0.6129				0.2508	0.3859	0.5045	0.5996	0.6795	0.7434	0.7928	0.8349	0.871	0.9013	0.9277	0.9498	0.9662	0.9785	0.9866
					3664.46	5646.15						0.07947	0.1026	0.1256	0.1477	0.1688	0.189	0.2083	0.2263	0.2434	0.2602	0.2763	0.2917	0.3063	0.3202	0.3335	0.3464	0.3589	0.3703	0.381	0.3912				0.153	0.2497	0.3407	0.4245	0.4994	0.5645	0.6227	0.674	0.7186	0.7567	0.7883	0.8162	0.8414	0.8638	0.8839
					5700.36	7161.65						0.2009	0.2571	0.3103	0.3591	0.4039	0.4461	0.4863	0.5246	0.5601	0.5919	0.6221	0.6512	0.6774	0.7007	0.7218	0.7412	0.7584	0.7732	0.7867	0.7977				0.1518	0.2496	0.347	0.4355	0.515	0.5834	0.6435	0.6963	0.7404	0.7789	0.8122	0.8414	0.8659	0.8852	0.9015
					2027.38	5167.57						0.2155	0.2743	0.3319	0.3874	0.438	0.485	0.5281	0.5678	0.6036	0.6366	0.6668	0.6944	0.7196	0.7428	0.7641	0.7836	0.8015	0.8179	0.8322	0.8445				0.1935	0.3246	0.4448	0.5462	0.6324	0.7048	0.7634	0.8116	0.8521	0.8847	0.912	0.9338	0.9509	0.9643	0.9741
					4839.23	4032.3						0.2227	0.3122	0.3957	0.4715	0.54	0.5975	0.6468	0.6897	0.7282	0.761	0.7883	0.8134	0.8347	0.8543	0.873	0.8904	0.9054	0.919	0.9305	0.9407				0.1335	0.2522	0.3795	0.5012	0.6048	0.6909	0.7593	0.8121	0.8526	0.882	0.9043	0.9224	0.9355	0.9462	0.9542
					2180.71	1996.4						0.1137	0.1734	0.232	0.2837	0.3312	0.3751	0.415	0.4516	0.4855	0.5164	0.5442	0.5695	0.5931	0.615	0.6361	0.6543	0.6712	0.6866	0.7006	0.7136				0.124	0.1986	0.2777	0.3547	0.4275	0.4932	0.5532	0.6084	0.6581	0.7025	0.7418	0.7763	0.8058	0.8317	0.8553
					4106.64	2948.14						0.09748	0.137	0.1758	0.213	0.2486	0.2825	0.315	0.3463	0.377	0.4068	0.4359	0.4638	0.4913	0.5181	0.5447	0.5701	0.5949	0.6187	0.6416	0.6636				0.138	0.2476	0.3572	0.4568	0.5458	0.6221	0.6905	0.751	0.802	0.8412	0.8742	0.9031	0.9266	0.9449	0.9595
					9001.63	5112.59						0.2583	0.3306	0.3907	0.4356	0.4721	0.5033	0.532	0.5593	0.5851	0.61	0.634	0.6557	0.6759	0.6954	0.7145	0.7332	0.751	0.7677	0.7837	0.7978				0.2398	0.3818	0.5155	0.6327	0.7298	0.8068	0.8678	0.9143	0.9483	0.9725	0.9848	0.9914	0.9948	0.9971	0.9985
					3519.65	2191.55						0.2427	0.3119	0.3729	0.4289	0.4813	0.5275	0.5697	0.6085	0.6433	0.6751	0.7046	0.7311	0.7528	0.7723	0.79	0.806	0.821	0.8353	0.8491	0.8622				0.2156	0.3072	0.3943	0.472	0.541	0.6004	0.6486	0.6903	0.728	0.762	0.7923	0.8178	0.8399	0.8596	0.8774
					3162.65	4971.65						0.2792	0.3524	0.4129	0.4602	0.4984	0.5314	0.5607	0.5874	0.612	0.6337	0.6531	0.6698	0.6845	0.6972	0.7089	0.7199	0.7298	0.7392	0.7481	0.7565				0.2067	0.3328	0.4481	0.545	0.6256	0.6941	0.7508	0.7966	0.8344	0.8675	0.8962	0.9196	0.9376	0.952	0.9638
					1820.61	8331.77						0.00907	0.01694	0.02494	0.03321	0.04181	0.05081	0.06007	0.06954	0.0794	0.08962	0.1001	0.1106	0.1216	0.1328	0.1445	0.1565	0.1687	0.181	0.1937	0.2065				0.2515	0.4155	0.5561	0.6628	0.7414	0.7994	0.8425	0.8775	0.9057	0.9288	0.945	0.9574	0.9665	0.9733	0.9788
					2389.02	9675.35						0.08991	0.1382	0.1852	0.2318	0.276	0.3167	0.3547	0.3902	0.4234	0.4526	0.479	0.5038	0.5271	0.5494	0.5705	0.5908	0.6101	0.6285	0.6462	0.6634				0.1915	0.3001	0.4003	0.4888	0.5643	0.6261	0.6739	0.7123	0.7439	0.7688	0.7901	0.8097	0.8277	0.8433	0.8574
					3120.83	3682.27						0.2489	0.3235	0.3905	0.4474	0.4963	0.54	0.5793	0.615	0.6474	0.6763	0.702	0.7247	0.7448	0.763	0.7787	0.793	0.8065	0.8189	0.8294	0.838				0.08023	0.158	0.2451	0.3356	0.4232	0.5049	0.5796	0.6465	0.7048	0.7528	0.7935	0.8281	0.8555	0.8785	0.8978
					6566.14	4434.21						0.1672	0.303	0.4258	0.5226	0.6054	0.6603	0.7031	0.7431	0.7812	0.8154	0.8485	0.8791	0.9026	0.9222	0.9401	0.9558	0.9699	0.9826	0.9934	0.9986				0.189	0.3029	0.4122	0.5083	0.5893	0.659	0.7168	0.7657	0.8073	0.8413	0.8671	0.8881	0.9058	0.92	0.9321
					3024.03	5326.32						0.09826	0.136	0.1719	0.2058	0.2378	0.2682	0.2976	0.3254	0.352	0.3777	0.4024	0.4264	0.4492	0.4714	0.493	0.5143	0.5353	0.5563	0.5768	0.5968				0.2136	0.3545	0.4913	0.6069	0.7021	0.7777	0.8363	0.8807	0.9118	0.9351	0.9534	0.9679	0.9779	0.985	0.9895
					10724.7	2964.4						0.2988	0.3812	0.4528	0.5109	0.5579	0.5965	0.63	0.6594	0.6839	0.7044	0.7216	0.7362	0.7491	0.7606	0.7711	0.7807	0.79	0.7985	0.8065	0.8139				0.2917	0.4259	0.5385	0.6282	0.699	0.7552	0.8009	0.8377	0.8675	0.8922	0.9126	0.9293	0.9431	0.9541	0.9634
					16382.4	5047.54						0.1267	0.1744	0.2184	0.2572	0.294	0.3299	0.3643	0.3979	0.431	0.4634	0.4946	0.524	0.5518	0.5785	0.6033	0.6268	0.6492	0.6708	0.6915	0.7111				0.1597	0.2483	0.3335	0.411	0.4803	0.5414	0.5951	0.6417	0.6833	0.7202	0.7518	0.7804	0.8065	0.8295	0.8505
					5689.52	6658.29						0.2447	0.2955	0.343	0.386	0.4268	0.4639	0.4988	0.5311	0.5612	0.5889	0.6149	0.6392	0.6619	0.6835	0.7042	0.7233	0.7402	0.756	0.7712	0.7858				0.1139	0.2029	0.297	0.3872	0.4698	0.5432	0.6085	0.6665	0.7176	0.7616	0.7998	0.8324	0.859	0.8822	0.9018
					5955.14	2811.85						0.3272	0.3944	0.451	0.4997	0.5421	0.5793	0.6125	0.6428	0.6702	0.695	0.7175	0.7384	0.7577	0.7757	0.7926	0.8083	0.8231	0.8369	0.8495	0.8612				0.2243	0.354	0.4763	0.5813	0.6716	0.7472	0.8065	0.8548	0.8937	0.923	0.946	0.9621	0.974	0.9829	0.9889
					7625.52	4006.75						0.3319	0.4006	0.4564	0.5019	0.5397	0.571	0.5975	0.6205	0.6413	0.6607	0.6787	0.6954	0.7111	0.7258	0.7392	0.7518	0.7641	0.7762	0.7882	0.7999				0.2685	0.3876	0.4987	0.5898	0.6618	0.718	0.7642	0.8009	0.83	0.8542	0.8748	0.8927	0.9075	0.921	0.9332
					5082.39	6044.19						0.7943	0.8465	0.8865	0.9167	0.9386	0.9547	0.9664	0.9738	0.9787	0.9824	0.9853	0.9876	0.9895	0.9911	0.9925	0.9939	0.9952	0.9964	0.9975	0.9985				0.1884	0.3271	0.4548	0.5602	0.6473	0.7175	0.7728	0.8148	0.8462	0.8698	0.8894	0.9059	0.9203	0.933	0.9434
					4605.36	4006.75						0.2694	0.3152	0.3575	0.3962	0.4327	0.4666	0.4986	0.5288	0.5572	0.5841	0.6092	0.6331	0.6559	0.678	0.6995	0.72	0.739	0.7569	0.7731	0.7882				0.1585	0.2744	0.3902	0.495	0.5871	0.6654	0.7299	0.7827	0.8266	0.8635	0.8929	0.9168	0.9365	0.9523	0.9652
					2423.87	913.018						0.4345	0.4856	0.5294	0.5668	0.5993	0.6277	0.6526	0.6751	0.6948	0.7124	0.728	0.743	0.7577	0.7716	0.7848	0.7964	0.8071	0.8178	0.8285	0.8391				0.2618	0.3912	0.5019	0.589	0.6543	0.7036	0.7422	0.7739	0.8007	0.824	0.8448	0.8627	0.8785	0.8928	0.9057
					4007.52	4671.18						0.3904	0.5022	0.5925	0.6643	0.7199	0.7641	0.8009	0.8311	0.857	0.8797	0.9004	0.9184	0.9335	0.946	0.9563	0.9648	0.9713	0.9768	0.9804	0.983
					2316.23	3003.12						0.3193	0.3727	0.419	0.4601	0.4969	0.5297	0.56	0.5882	0.6144	0.6391	0.6624	0.6851	0.7066	0.727	0.7457	0.762	0.7767	0.7899	0.8015	0.8127			KIR2.1	0.2353	0.365	0.4829	0.5797	0.6566	0.7169	0.765	0.8026	0.8329	0.8558	0.8745	0.8904	0.9035	0.9144	0.9236
					2310.04	5611.3																													0.2463	0.4047	0.5396	0.6451	0.7277	0.79	0.8384	0.8746	0.902	0.9224	0.9385	0.951	0.9614	0.9705	0.9782
					1150.76	4346.71																													0.2311	0.3744	0.5024	0.6044	0.6865	0.7534	0.8092	0.8545	0.8902	0.9181	0.94	0.956	0.9687	0.9784	0.9852
					7631.71	747.296																													0.3167	0.4912	0.6305	0.7279	0.7952	0.8457	0.886	0.9174	0.9439	0.9648	0.9812	0.9909	0.9952	0.9967	0.9981
					1099.65	1421.8																													0.2287	0.3449	0.4463	0.5321	0.603	0.6618	0.711	0.7539	0.7888	0.8181	0.8427	0.8628	0.8794	0.8945	0.908
					7968.58	5741.4																													0.2186	0.3468	0.4651	0.5649	0.6493	0.7189	0.7773	0.8248	0.8631	0.8933	0.9168	0.9344	0.9477	0.9588	0.9678
					4522.5	545.178																													0.2923	0.4582	0.5906	0.6788	0.7418	0.791	0.8293	0.86	0.885	0.9057	0.9224	0.9368	0.949	0.9589	0.9676
					2296.87	7527.17																													0.2765	0.4305	0.5632	0.6632	0.736	0.7896	0.8299	0.8623	0.8897	0.9129	0.9312	0.9449	0.9563	0.9641	0.9708
					2141.99	9927.81																													0.1453	0.2638	0.3767	0.4722	0.5501	0.6139	0.6664	0.7101	0.747	0.7793	0.8073	0.8309	0.8518	0.8705	0.8866
					3981.19	5465.72																													0.26	0.3965	0.5146	0.6059	0.6767	0.7347	0.7816	0.8206	0.8532	0.8797	0.9009	0.9173	0.9287	0.9383	0.9465
					5445.58	5920.29																													0.2493	0.3543	0.4554	0.5457	0.6259	0.6949	0.7536	0.8025	0.842	0.8736	0.8992	0.9207	0.9373	0.9498	0.959
					7688.24	5965.98																													0.3306	0.4371	0.5273	0.6017	0.6623	0.7113	0.7502	0.7807	0.8049	0.8257	0.844	0.8606	0.8755	0.8892	0.902
					1186.38	7966.25																													0.1091	0.2059	0.305	0.3977	0.4829	0.559	0.6261	0.6845	0.7345	0.7777	0.8151	0.8465	0.8738	0.8968	0.9155
					3782.17	4907.37																													0.1807	0.2664	0.3474	0.4227	0.4914	0.5528	0.6063	0.6535	0.6949	0.7316	0.7643	0.7932	0.8191	0.8423	0.8629
					7898.11	6525.87																													0.1942	0.2806	0.3612	0.434	0.5005	0.5609	0.6154	0.6645	0.7089	0.7484	0.7833	0.8137	0.8408	0.8647	0.8854
					2475.76	7877.97																													0.1459	0.2235	0.301	0.373	0.4398	0.5007	0.5557	0.6058	0.6515	0.6924	0.729	0.7612	0.7893	0.8149	0.8378
					5142.02	11313.2																													0.1453	0.2638	0.3767	0.4722	0.5501	0.6139	0.6664	0.7101	0.747	0.7793	0.8073	0.8309	0.8518	0.8705	0.8866
					4136.07	3185.88																													0.243	0.335	0.4208	0.5004	0.5735	0.6378	0.6941	0.7437	0.7872	0.8252	0.8569	0.8824	0.9034	0.9219	0.9378
					1072.54	6853.44																													0.2888	0.4319	0.5616	0.665	0.7478	0.813	0.8628	0.9007	0.9282	0.9479	0.9623	0.9734	0.9815	0.9874	0.9914
					8309.31	6161.13																													0.22	0.3523	0.4735	0.5759	0.6612	0.7312	0.7886	0.8326	0.8654	0.892	0.9141	0.9314	0.9446	0.9536	0.9608
					3889.04	2851.34																													0.3457	0.5168	0.6577	0.7643	0.8387	0.8911	0.9267	0.9527	0.9705	0.9802	0.9864	0.99	0.9927	0.9949	0.9969
					5845.17	7532.59																													0.1704	0.3047	0.4414	0.5652	0.6713	0.7563	0.8227	0.8739	0.9122	0.9396	0.959	0.9731	0.9823	0.9878	0.991
					3869.68	10528																													0.1427	0.2399	0.3328	0.4141	0.4843	0.5403	0.5872	0.6293	0.6651	0.6959	0.7209	0.74	0.7557	0.7691	0.7814
					3442.21	4194.15																													0.2538	0.3912	0.5028	0.5844	0.6461	0.6956	0.7375	0.7751	0.8077	0.8348	0.8564	0.8739	0.8891	0.9019	0.914
					5650.02	11058.4																													0.0802	0.1565	0.2406	0.3277	0.4145	0.4994	0.5782	0.6498	0.7145	0.7708	0.8188	0.8587	0.8908	0.9171	0.9398
					2277.51	2471.11																													0.3898	0.5623	0.6926	0.776	0.8266	0.8648	0.8956	0.9188	0.9369	0.9528	0.967	0.9799	0.9877	0.9932	0.9962
					9058.93	4564.31																													0.2291	0.3752	0.5056	0.6114	0.6942	0.7597	0.8115	0.852	0.8845	0.9114	0.9317	0.9473	0.9593	0.9689	0.9763
					3316.76	6711.72																													0.2974	0.4486	0.5671	0.65	0.7144	0.7677	0.8134	0.8515	0.8804	0.9043	0.9234	0.94	0.9545	0.9669	0.9775
					3422.07	6397.32																													0.3295	0.4918	0.618	0.7102	0.7778	0.8286	0.8683	0.8978	0.921	0.9384	0.9516	0.9617	0.9685	0.9739	0.978
					2420.77	12187.5																													0.2435	0.3888	0.5173	0.6189	0.6971	0.7608	0.8135	0.8531	0.8841	0.91	0.9315	0.9485	0.9623	0.9734	0.9816
					10909	3165.75																													0.1719	0.2747	0.3753	0.467	0.548	0.6196	0.6811	0.7337	0.7781	0.8157	0.8466	0.8718	0.8936	0.9112	0.926
					1694.39	17173.1																													0.1358	0.2684	0.4053	0.5304	0.6391	0.7221	0.7828	0.8275	0.8623	0.8899	0.911	0.927	0.9384	0.9483	0.9574
					2079.26	6961.86																													0.1122	0.188	0.2689	0.3484	0.4233	0.4945	0.5606	0.6203	0.6722	0.7187	0.7606	0.7956	0.8259	0.85	0.8716
					7048.59	9031.83																													0.2878	0.4289	0.5538	0.6516	0.7276	0.7863	0.832	0.869	0.8987	0.9219	0.9403	0.9536	0.9647	0.9735	0.9811
					2284.48	4279.33																													0.1803	0.2832	0.3816	0.4717	0.5507	0.6157	0.6701	0.7166	0.756	0.7911	0.8228	0.8516	0.8771	0.8996	0.9182
					1805.13	9954.91																													0.125	0.2016	0.283	0.3633	0.4404	0.5107	0.5732	0.6288	0.6773	0.7184	0.7543	0.787	0.8166	0.8426	0.8664
					2548.55	2519.9																													0.2982	0.4484	0.5798	0.6866	0.7695	0.8316	0.8772	0.912	0.9378	0.956	0.969	0.9781	0.985	0.9901	0.9938
					6769.03	8662.44																													0.1919	0.3021	0.4076	0.4995	0.575	0.6348	0.6825	0.7211	0.7527	0.7788	0.801	0.8203	0.8378	0.8539	0.8694
					5340.26	15638.2																													0.2468	0.3814	0.5071	0.6147	0.7014	0.77	0.8244	0.8656	0.8954	0.9188	0.9383	0.9542	0.9657	0.9755	0.9836
					1614.62	2845.15																													0.3025	0.4666	0.6013	0.703	0.7742	0.8241	0.863	0.8944	0.9188	0.9383	0.9534	0.966	0.9748	0.9813	0.987
					6482.5	7141.52																													0.158	0.2555	0.351	0.4365	0.5095	0.5712	0.6232	0.6687	0.7087	0.7434	0.7728	0.7993	0.8221	0.8422	0.8596
					10156.3	7025.36																													0.1733	0.2952	0.4123	0.5129	0.5968	0.6654	0.7207	0.7641	0.7976	0.823	0.8439	0.8616	0.8765	0.8875	0.8968
					6566.14	9151.86																													0.2029	0.3441	0.4683	0.5689	0.6497	0.7137	0.7637	0.8015	0.8316	0.856	0.8769	0.8943	0.908	0.9196	0.9294
					8055.31	4898.08																													0.1795	0.3081	0.4312	0.5381	0.6264	0.6982	0.7564	0.8022	0.8366	0.8656	0.8901	0.9105	0.9272	0.9409	0.952
					8654.69	2256.6																													0.2368	0.3645	0.4796	0.5743	0.6479	0.7068	0.7538	0.7911	0.8212	0.8444	0.8622	0.8772	0.8905	0.9028	0.9145
					7495.42	2771.58																													0.2411	0.3709	0.4868	0.5809	0.6534	0.7115	0.7583	0.7955	0.8253	0.8478	0.865	0.8796	0.8925	0.9045	0.916
					7290.2	5215.58																													0.3203	0.4669	0.5819	0.6646	0.7264	0.7742	0.813	0.8448	0.8697	0.8895	0.9052	0.9169	0.9252	0.932	0.9378
					4967.78	2976.79																													0.3136	0.4859	0.6286	0.7319	0.8083	0.8612	0.8979	0.9238	0.9429	0.9569	0.9675	0.9756	0.982	0.9869	0.9901
					3331.47	7238.32																													0.2058	0.3316	0.4486	0.5507	0.6363	0.7085	0.7683	0.8176	0.8564	0.8865	0.9111	0.9304	0.9454	0.9569	0.9664
					9878.25	2149.73																													0.1974	0.358	0.5103	0.6381	0.7326	0.8034	0.8543	0.8906	0.9175	0.9372	0.952	0.9633	0.9713	0.9777	0.9829
					3783.72	7722.32																													0.2137	0.3319	0.4385	0.5286	0.6045	0.6679	0.7212	0.7666	0.8049	0.8372	0.8637	0.8859	0.9052	0.9213	0.9344
					6714.82	10586																													0.2215	0.3667	0.4982	0.6081	0.6966	0.768	0.8258	0.8722	0.9082	0.9361	0.9564	0.9695	0.9782	0.9846	0.9895
					5114.14	5897.06																													0.25	0.3904	0.5187	0.6272	0.7166	0.7859	0.839	0.8792	0.9106	0.9359	0.9553	0.9689	0.9792	0.9867	0.9912
					6799.23	2504.41																													0.1859	0.3252	0.4584	0.5699	0.6666	0.7488	0.8123	0.8589	0.8959	0.9248	0.9465	0.964	0.9773	0.9855	0.9916
					11592	1928.26																													0.2019	0.3145	0.4155	0.5011	0.5747	0.6381	0.6917	0.7366	0.775	0.8081	0.8371	0.8629	0.8856	0.9058	0.923
					6528.97	5270.57																													0.2633	0.389	0.4969	0.5829	0.6515	0.7069	0.7511	0.7869	0.817	0.8421	0.8643	0.8837	0.9003	0.9149	0.927
					9627.34	13674.4																													0.1986	0.3136	0.4218	0.5172	0.599	0.6699	0.7299	0.7819	0.826	0.8627	0.8934	0.9173	0.936	0.9508	0.9629
					7061.75	3717.12																													0.1854	0.3014	0.4056	0.4928	0.5642	0.6227	0.6719	0.7125	0.7472	0.7752	0.7989	0.8186	0.8354	0.8503	0.8631
					2375.86	5042.89																													0.2036	0.3522	0.4936	0.6128	0.7084	0.7789	0.8335	0.8766	0.9099	0.9351	0.9541	0.9669	0.9757	0.982	0.9866
					11480.5	7300.27																													0.2315	0.3675	0.4856	0.5804	0.6548	0.7133	0.758	0.7902	0.8129	0.8303	0.8442	0.8555	0.8653	0.8742	0.8823
					10147.7	3240.09
					5225.65	7870.23
					9494.14	9353.2
					5811.1	6580.85
					3787.59	2373.54
					2823.46	3670.66
					4135.3	14146.7
					3083.66	9776.03
					3120.83	4006.75
					4036.17	7727.74
					5057.61	6381.83
					2120.31	3658.27
					6143.32	6185.91
					6143.32	3071.27
					4908.15	6030.25
					4500.04	3180.46
					8340.29	3909.17
					2655.42	5643.05
					8193.93	7698.31
					5066.12	8927.28
					4328.9	9383.4
					10498.5	3058.88
					3526.62	2059.9
					17038.3	1882.57
					1359.07	7864.81
					10424.2	10641.8
					4510.11	7603.83
					15701	12151.1
					2729.76	7783.49
					4845.42	6193.65
					5838.2	5954.36
					6223.85	6026.38
					6908.42	12936.4
					5944.29	3925.43
					10274.7	5682.55
					3473.18	5974.5
					9655.99	10804.4
					4313.41	6384.15
					2771.58	6565.36
					7398.62	6807.75
					6889.06	7404.04
					2510.6	4462.87
					9676.9	4987.14
					2371.21	3484.03
					8895.53	1980.92
					8322.48	10981.8
					19038.6	7589.12
					10365.3	4498.49
					12228.6	16298.8
					7009.87	12568.5
					6196.75	4926.73
					4810.57	6233.92
					12632	4384.65
					2979.12	9649.02
					11858.4	5368.14
					10146.2	6192.88
					2660.84	13315
					7787.37	5681
					6975.02	16250.8
					3378.71	5108.72
					3971.12	4156.2
					3188.98	4921.31
					3079.01	8004.97
					1518.6	2547.78
					6254.83	8118.81
					8144.36	3465.44
					8013.49	2060.68
					3243.19	3904.52
					7201.15	1962.33
					2612.05	4953.84
					4288.63	5361.17
					5794.06	2814.17
					4041.59	2114.89
					10748.7	4778.05
					6867.38	6496.44
					3179.69	7164.75
					4216.61	4156.98
					3992.03	6796.13
					4903.5	782.918
					2785.52	10009.1
					5512.18	4279.33
					5488.95	2901.68
					3351.6	5640.73
					6858.86	8434.76
					1645.6	3374.06
					1477.56	5795.61
					7938.37	7732.38
					6319.88	8584.22
					2659.29	1934.45
					4544.18	3624.97
					1677.35	1252.2
					3006.22	5316.26
					9541.38	6248.63
					2442.46	4900.4
					8287.63	9410.51
					9679.23	5869.95
					10926.8	3045.72
					3896.78	10054.8
					4989.46	5151.31
					10622.4	4629.36
					10071.1	11597.4
					4617.75	5518.37
					6453.08	9996.73
					17095.7	7671.21
					4536.44	4399.37
					7462.89	9207.62
					1132.17	3018.61
					6001.6	10903.6
					6895.26	1891.08
					3428.27	2015.76
					6583.95	10710
					7090.41	3038.75
					5759.99	5334.84
					11356.6	4539.53
					9832.56	7305.69
					6573.88
					4560.44
					5071.55
					1239.81
					1653.34
					2742.92
					5815.74
					3072.82
					3904.52
					8196.25
					17339.6
					17736.1
					19894.3
					11939.7
					7859.39
					11546.3
					3992.81
					9145.66
					4270.04
					11940.5
					4336.64
					4699.83
					3809.27
					3733.38
					7511.68
					13491.6
					4537.98
					8990.78
					4975.52
					2276.74
					2223.3
					1850.82
					5761.54
					2536.93
					933.926
					1624.69
					5348.78
					3611.03
					4565.86
					3545.2
					1993.31
					7682.05
					4751.72
					3401.16
					2606.63
					2293
					6417.45
					3033.32
					797.632
					2582.62
					3081.34
					3955.64
					13090.5
					5034.37
					8068.47
					5686.42
					7520.2
					2598.11
					10648
					13364.6
					4348.26
					9889.86
					7135.32
					2836.63
					1809.77
					2175.29
					9728.01
					2627.54
					3693.89
					3710.15
					11054.6
					9769.06
					9868.18
					3271.07
					4064.83
					7489.22
					710.899
					7945.34
					4523.27
					4176.34
					11599
					2245.76
					8712
[truncated: 5 more columns]
