# Supplementary material for: Acquisition of innate odor preference depends on spontaneous and experiential activities during critical period
Source: eLife. 2021 Mar 26;10:e60546. doi: 10.7554/eLife.60546 (PMC8032394; doi:10.7554/eLife.60546)
Supplement: Figure 7—figure supplement 1—source data 1. [file elife-60546-fig7-figsupp1-data1.xlsx]

## Sheet: Sheet1
	Figure 7–figure supplement 1-Source Data1_PS6 staining for PEA
	BST				PVA				AHA				PLCo				MePV				MePD				VMH				BLA				Pir
	Air	Ctrl_PEA	KIR2.1-off_PEA		Air	Ctrl_PEA	KIR2.1-off_PEA		Air	Ctrl_PEA	KIR2.1-off_PEA		Air	Ctrl_PEA	KIR2.1-off_PEA		Air	Ctrl_PEA	KIR2.1-off_PEA		Air	Ctrl_PEA	KIR2.1-off_PEA		Air	Ctrl_PEA	KIR2.1-off_PEA		Air	Ctrl_PEA	KIR2.1-off_PEA		Air	Ctrl_PEA	KIR2.1-off_PEA
	19.6114	296.089	198.113		1760.03	4069.62	5580.8		35.7251	2072.85	287.994		1180.15	4890.83	3938.75		62.5037	2628.52	354.005		14.4743	994.584	150.849		248.68	988.383	348.195		72.7909	2091.14	1520.42		130.976	1768.83	3302.58
	20.8613	734.336	308.895		3507.54	5654.15	2766.95		376.397	1924.18	821.236		808.647	2884.16	1716.62		231.972	2045.76	204.79		278.371	1455.57	324.135		335.503	522.95	374.334		96.8807	1222.75	200.123		1485.54	3622.14	2841.72
	154.093	1156.65	158.261		4259.82	6013.63	3056.44		1118.11	2148.82	999.99		2823.38	3908.02	2139.72		260.499	1689.61	1103.72		411.4	1236.54	241.925		457.522	687.359	236.678		319.655	1363.37	333.802		3047.74	3317.5	3502.12
	78.5087	368.48	372.113		763.773	6400.1	4769.64		52.2434	3310.38	1167.85		1109.03	6081.06	3282.49		246.614	2078.76	1005.81		98.2466	1118.01	1324.42		552.066	3536.91	232.867		54.0313	1924.65	582.505		1827.65	2060.06	1694.5
	23.1683	574.14	209.591		3236.83	4535.39	6476.17		541.385	1528.6	472.173		1889.92	2775.38	2822.17		1142.52	1874.33	319.679		148.407	1193.5	345.938		129.747	431.194	234.817		247.822	1346.85	709.803		2010.24	4165.52	3593.87
	243.087	1052.9	184.649		2961.98	4635.15	3737.85		1447.7	2106.21	1073.53		3047.19	3504.04	3658.25		212.51	1897.99	1196.34		400.631	1221.48	352.887		73.8258	998.482	278.375		269.179	789.323	154.041		2566.95	4205.03	2832
			123.737				3558.69				824.507				2984.96				1213.12				332.785				188.79				332.888
			209.45				4945.93				818.263				2581.29				768.427				1586.66				339.927				628.773
