# Supplementary material for: Acquisition of innate odor preference depends on spontaneous and experiential activities during critical period
Source: eLife. 2021 Mar 26;10:e60546. doi: 10.7554/eLife.60546 (PMC8032394; doi:10.7554/eLife.60546)
Supplement: Figure 7—source data 1. [file elife-60546-fig7-data1.xlsx]

## Sheet: Sheet1
Figure 7B PS6 staining of 2-MBA																										Figure 7D PS6 staining of Female Urine
BST				AHA				PLCo				MePV				MePD				VMH						ACo				PLCo				MePV				MePD				VMHvl
Air	Ctrl	Kir2.1-off		Air	Ctrl	Kir2.1-off		Air	Ctrl	Kir2.1-off		Air	Ctrl	Kir2.1-off		Air	Ctrl	Kir2.1-off		Air	Ctrl	Kir2.1-off				Air	Ctrl	Kir2.1-off		Air	Ctrl	Kir2.1-off		Air	Ctrl	Kir2.1-off		Air	Ctrl	Kir2.1-off		Air	Ctrl	Kir2.1-off
99.1472	84.606	41.1847		2.44405	27.6128	13.3928		40.1239	13.4816	45.0352		5.07068	5.8897	9.67491		18.5132	21.7815	16.3952		0	7.63865	2.40787				13.8384	114.569	63.8667		40.1239	121.893	94.9107		18.5132	115.993	72.9014		5.07068	44.307	81.0682		0	14.7781	8.3871
83.3163	115.597	40.7351		2.72217	12.5684	0.9797		32.4188	9.71666	10.2821		5.73355	6.33472	13.7831		4.98118	28.7566	13.7154		0.47878	8.88484	0				132.551	162.959	71.8384		32.4188	84.0014	26.7428		4.98118	130.451	81.0682		58.8062	37.8867	38.5058		0.55622	29.2354	12.8811
9.09413	111.359	21.0534		4.21637	49.4151	9.20347		51.2254	176.255	132.108		58.8062	7.57635	15.6011		49.4347	74.5661	35.3178		2.4188	64.5337	4.14343				15.8382	42.6965	88.2829		51.2254	159.901	30.1984		49.4347	88.2829	42.333		5.73355	167.97	17.3212		0	23.5785	0.45751
21.3363	108.518	93.1309		0.47212	32.7205	19.9656		14.5178	215.15	113.874		1.13903	8.05335	7.02057		15.8425	46.029	36.767		11.1159	50.0495	0				33.9566	68.411	72.9144		14.5178	148.334	25.8614		15.8425	112.751	53.7134		1.13903	132.21	6.80104		1.9252	37.8247	9.08881
