# Supplementary material for: Acquisition of innate odor preference depends on spontaneous and experiential activities during critical period
Source: eLife. 2021 Mar 26;10:e60546. doi: 10.7554/eLife.60546 (PMC8032394; doi:10.7554/eLife.60546)
Supplement: Figure 8—source data 1. [file elife-60546-fig8-data1.xlsx]

## Sheet: Sheet1
Figure 8B PS6 staining for PEA
BST				PVA				AHA				BLA				PLCo				MePV				MePD				VMH				Pir
Air_Ctrl	PEA_P0-P14	PEA_P24-P38		Air_Ctrl	PEA_P0-P15	PEA_P24-P39		Air_Ctrl	PEA_P0-P16	PEA_P24-P40		Air_Ctrl	PEA_P0-P17	PEA_P24-P41		Air_Ctrl	PEA_P0-P18	PEA_P24-P42		Air_Ctrl	PEA_P0-P19	PEA_P24-P43		Air_Ctrl	PEA_P0-P20	PEA_P24-P44		Air_Ctrl	PEA_P0-P21	PEA_P24-P45		Air_Ctrl	PEA_P0-P22	PEA_P24-P46
117.591	81.5522	271.545		2753.72	2638.51	2533.12		342.813	491.455	670.263		1531.4	1243.04	2417.48		170.633	388.782	557.107		18.9237	127.362	593.339		115.963	56.8385	189.657		310.945	673.572	548.966		382.207	1123.82	1224.15
278.367	85.6726	410.698		668.871	2139.94	3199.18		46.2033	336.022	718.05		2890.9	1100.33	1827.52		699.088	115.037	267.036		64.5002	20.0022	161.741		52.1147	116.138	38.8271		0	39.5875	0		1842.17	873.99	592.234
146.104	170.15	567.606		1529.83	1531.13	2664.35		61.1275	313.023	567.103		1232.13	1884.76	2647.58		1486.45	450.851	213.849		17.2432	115.869	158.953		35.9469	0	221.234		29.2176	179.314	238.392		342.016	629.505	377.59
126.987	182.01	562.694		2631.51	2858.6	2152.91		388.858	345.494	475.43		1486.67	910.697	2748.21		69.935	385.2	536.532		172.844	102.963	379.027		274.871	92.5983	151.923		196.312	642.77	448.075		514.432	629.111	1390.96
217.221	303.497	404.978		762.687	1566.7	2110.25		0	455.839	587.822		1477.73	1037.66	1548.64		14.7599	302.556	235.026		12.0414	17.6595	222.567		134.787	107.616	112.449		0	156.317	149.03		295.624	1721.14	611.978
78.8443	105.553	542.595		1706.13	1626.3	2471.44		77.3041	195.354	680.93		1912.57	1174.14	2600.35		967.27	284.722	979.326		29.7963	129.93	401.453		34.0477	54.6447	49.954		69.106	285.851	162.58		1106.18	1543.98	584.802
