# Supplementary figures and images for: Acquisition of innate odor preference depends on spontaneous and experiential activities during critical period
Source: eLife journal article supplement (doi:10.7554/elife.60546), 2021-03-26

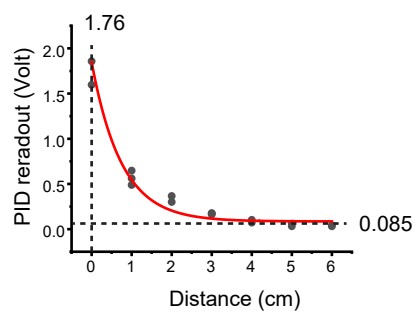

**Figure 2–figure supplement 1**

Supplement: supp [file elife-60546-supp-v1.zip]

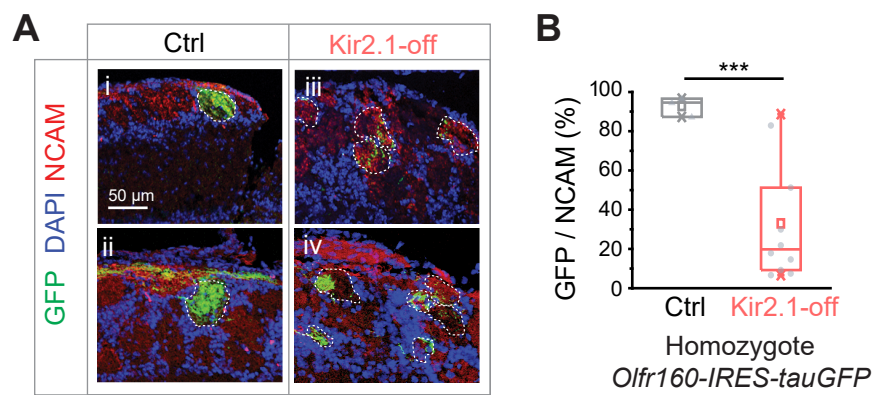

**Figure 5—figure supplement 1**

Supplement: supp [file elife-60546-supp-v1.zip]

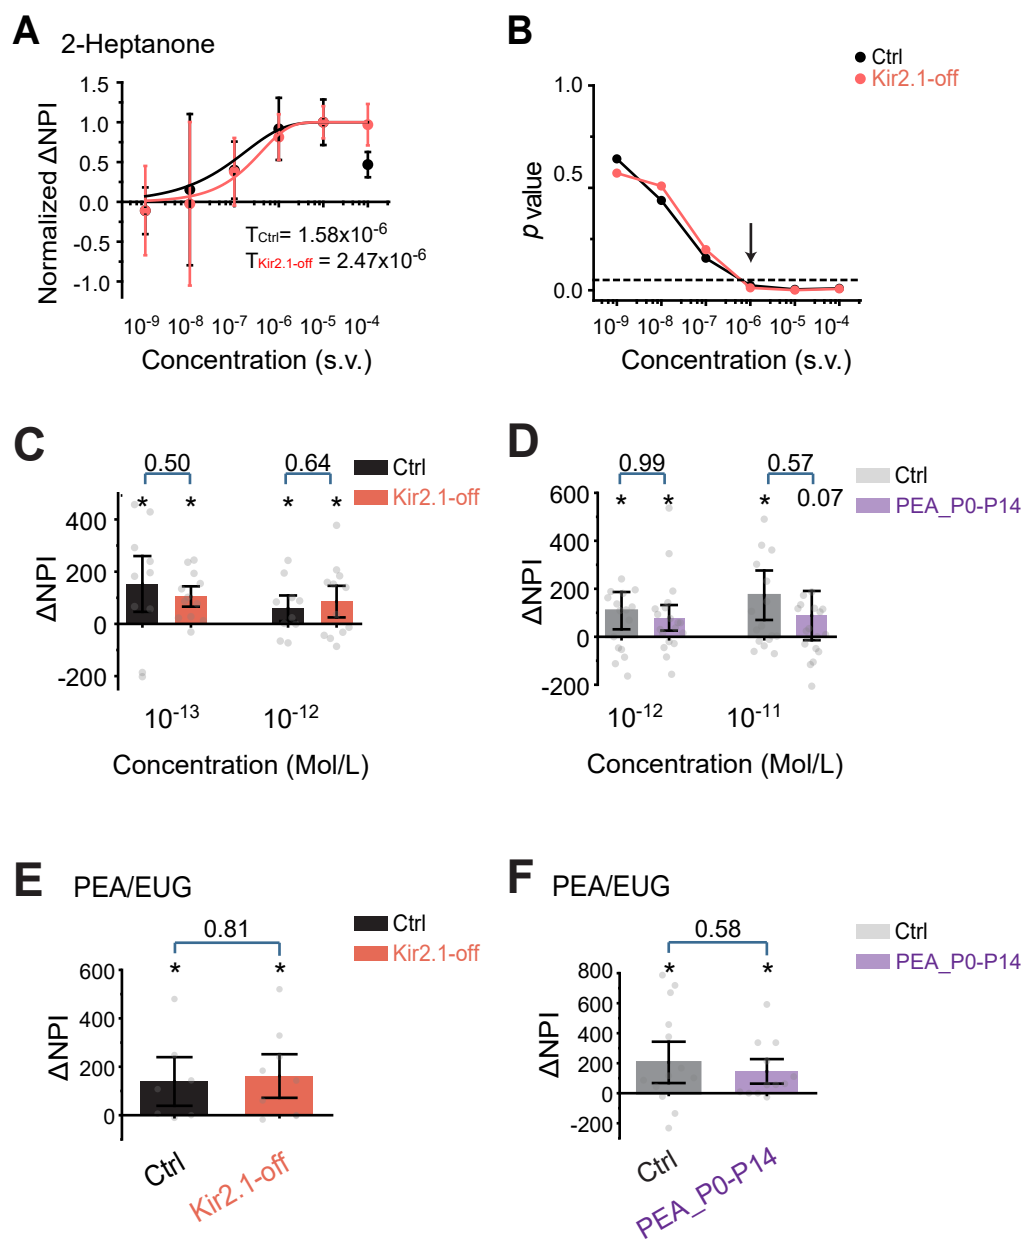

Figure 4—figure supplement 1

Supplement: supp [file elife-60546-supp-v1.zip]

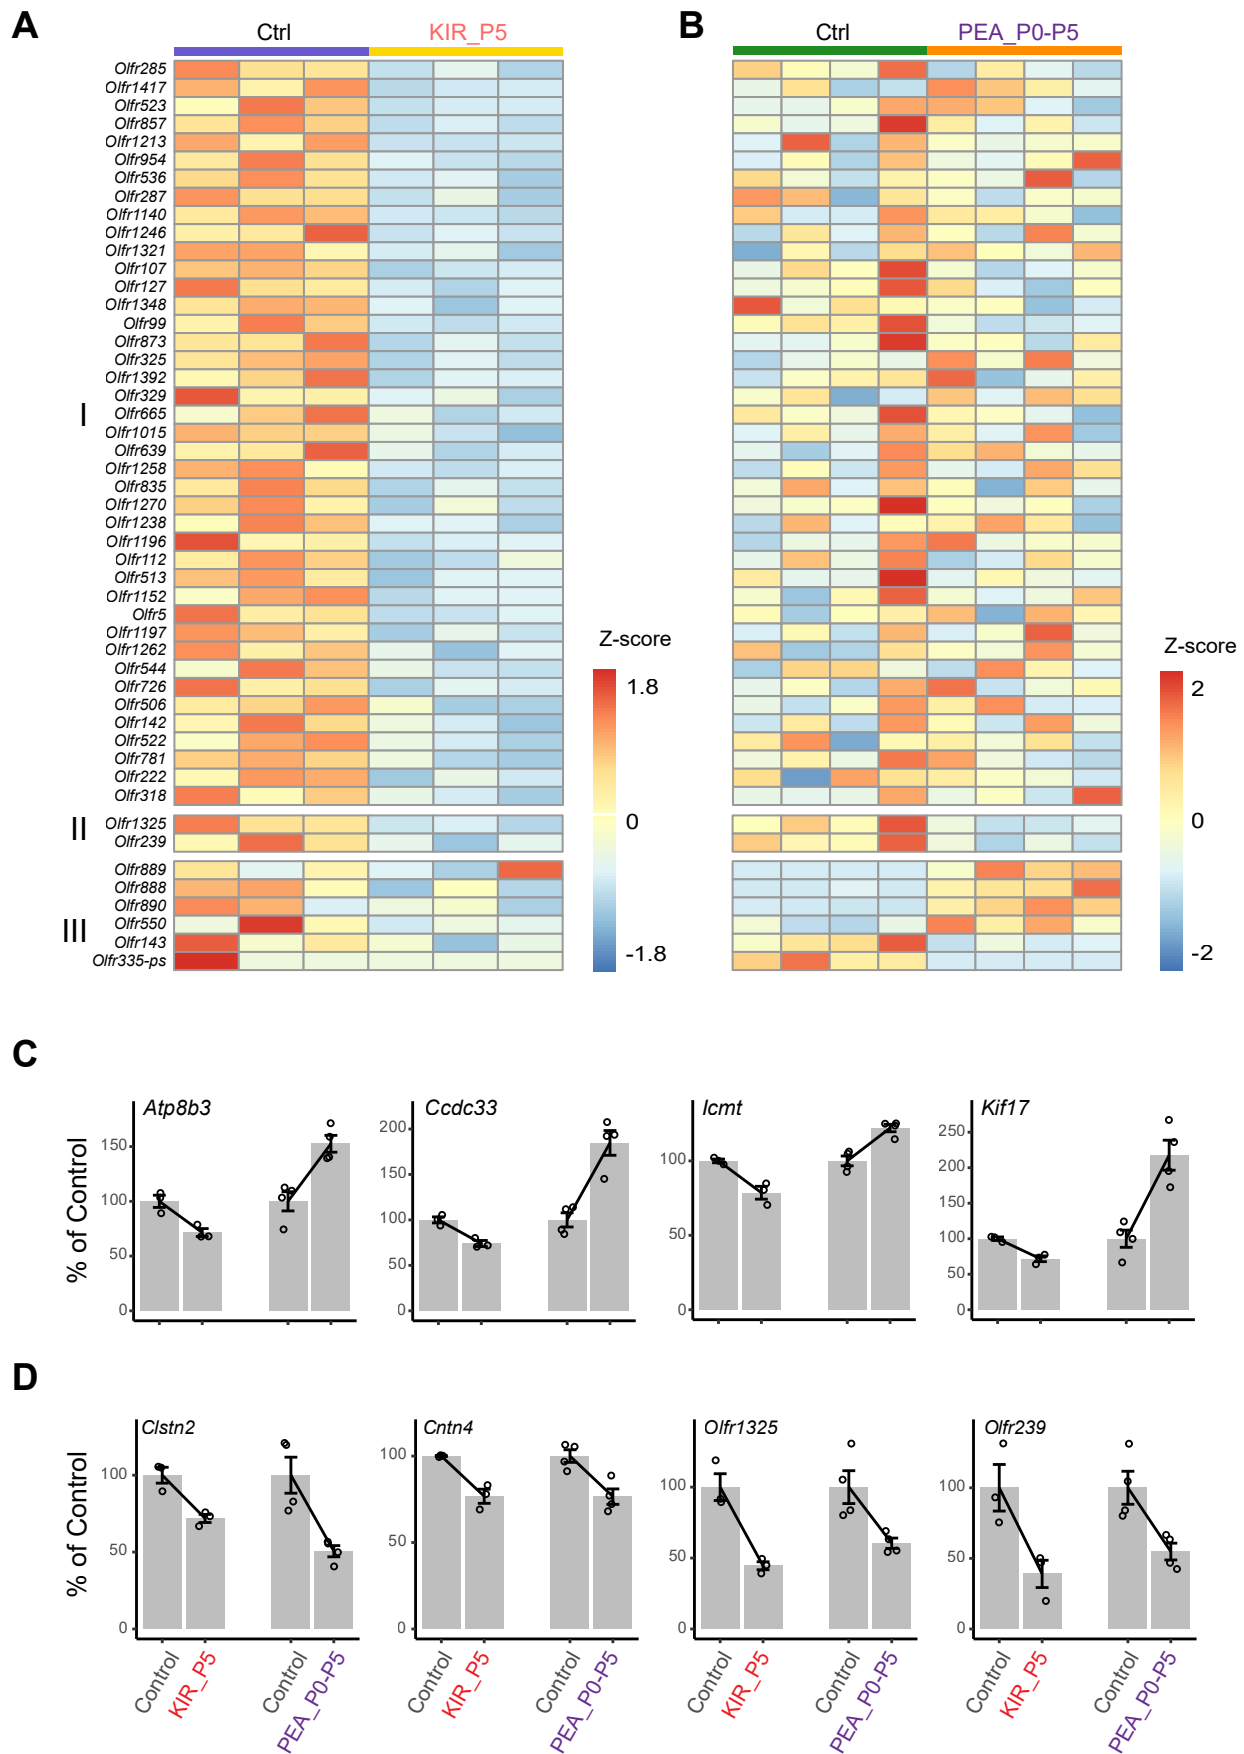

Figure 6—figure supplement 1

Supplement: supp [file elife-60546-supp-v1.zip]

**A**

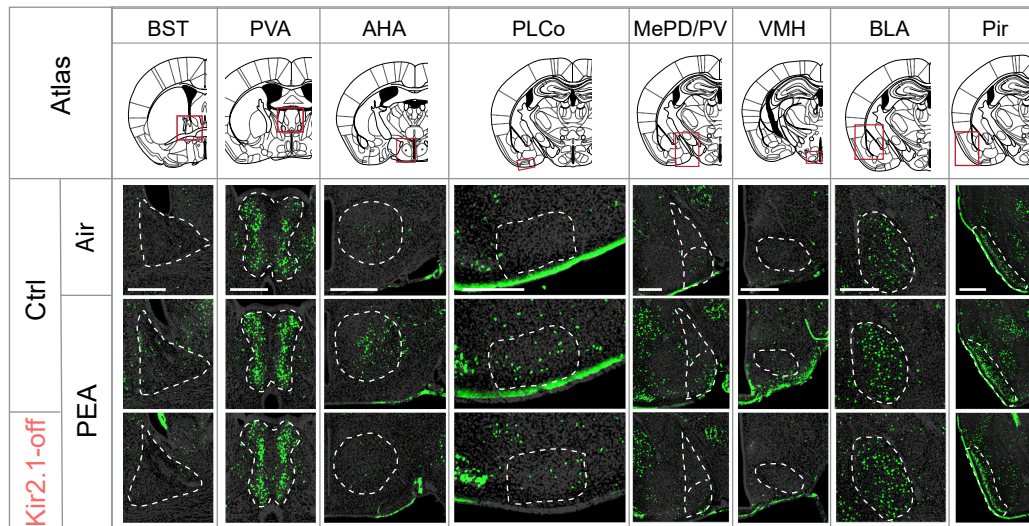

**B**

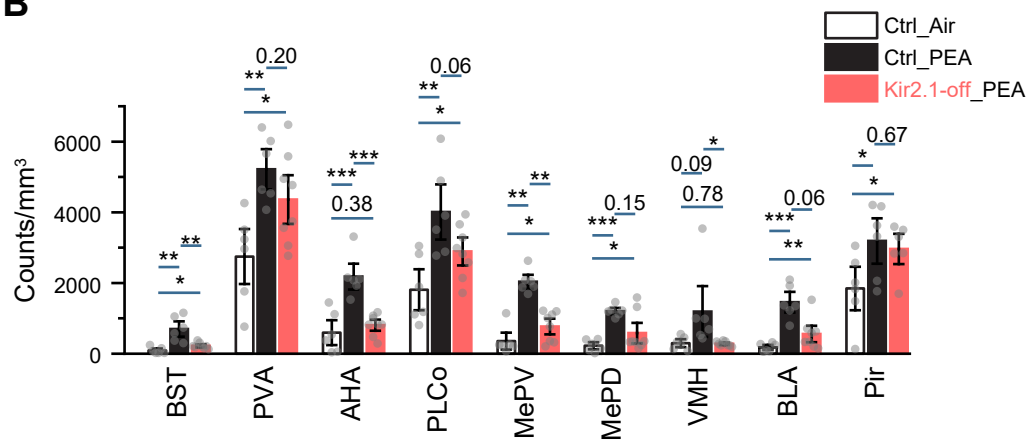

**Figure 7–figure supplement 1**

Supplement: supp [file elife-60546-supp-v1.zip]
